# Supplementary material for: Sustainable and scalable development of PVDF-OH Ag/TiOx nanocomposites for simultaneous oil/water separation and pollutant degradation
Source: Royal Society of Chemistry journal article supplement (doi:10.1039/d3en00335c), 2023-01-01
Supplement: d3en00335c1.pdf [file d3en00335c1.pdf]

## Supplementary Information for: Sustainable and scalable development of PVDF-OH Ag/TiO<sub>x</sub> nanocomposites for simultaneous oil/water separation and pollutant degradation

Ondřej Havelka,<sup>a,b</sup> Fatma Yalcinkaya,<sup>a</sup> Stanislaw Waclawek,<sup>a</sup> Vinod V.T. Padil,<sup>c</sup> Vincenzo Amendola,<sup>d</sup> Miroslav Černík<sup>a</sup> and Rafael Torres-Mendieta<sup>a,\*</sup>

<sup>a</sup>Institute for Nanomaterials, Advanced Technologies and Innovation, Technical University of Liberec, Liberec, Studentská 1402/2, 461 17, Czech Republic.

<sup>b</sup>Faculty of Mechatronics, Informatics and Interdisciplinary Studies, Technical University of Liberec, Liberec, Studentská 1402/2, 461 17, Czech Republic.

<sup>c</sup>Amrita School for Sustainable Development (AST), Amrita Vishwa Vidyapeetham, Amrita University, Amritapuri, Clappana P. O. Kollam, Kerala, India, PIN-690525

<sup>d</sup>Department of Chemical Sciences, University of Padova, Padova, I-35131, Italy.

### 1. Permeate flux

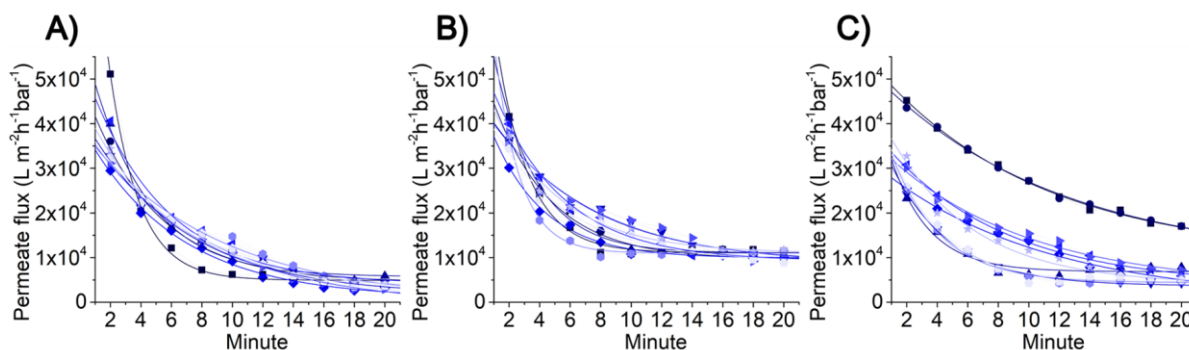

Figure S1: Set of graphs displaying the fitted permeate fluxes of the nanocomposites prepared at the pH 2 (A), original pH (B), and pH 11 (C).

**Table S1.** Fitting of permeate flux in each cycle

| Sample | Cycle | Permeate flux fit                          | Estimated permeate after 1 month |
|--------|-------|--------------------------------------------|----------------------------------|
| pH 2   | 1     | $4932+127848 \cdot \exp(-0.51184 \cdot x)$ | 4932                             |
|        | 2     | $4522+46256 \cdot \exp(-0.22075 \cdot x)$  | 4522                             |
|        | 3     | $5670+56482 \cdot \exp(-0.2673 \cdot x)$   | 5670                             |
|        | 4     | $1641+40887 \cdot \exp(-0.15555 \cdot x)$  | 1641                             |
|        | 5     | $887+39190 \cdot \exp(-0.1644 \cdot x)$    | 887                              |
|        | 6     | $4044+50908 \cdot \exp(-0.19875 \cdot x)$  | 4044                             |
|        | 7     | $-604+40835 \cdot \exp(-0.13084 \cdot x)$  | 0                                |
|        | 8     | $305+38729 \cdot \exp(-0.11574 \cdot x)$   | 305                              |

|               |    |                                            |              |
|---------------|----|--------------------------------------------|--------------|
|               | 9  | $2811+42907 \cdot \exp(-0.17186 \cdot x)$  | <b>2811</b>  |
|               | 10 | $-44+40914 \cdot \exp(-0.13024 \cdot x)$   | <b>0</b>     |
| <b>pH 7.1</b> | 1  | $11115+78943 \cdot \exp(-0.47383 \cdot x)$ | <b>11115</b> |
|               | 2  | $9650+44919 \cdot \exp(-0.26282 \cdot x)$  | <b>9650</b>  |
|               | 3  | $11042+61360 \cdot \exp(-0.35609 \cdot x)$ | <b>11042</b> |
|               | 4  | $8754+36420 \cdot \exp(-0.15094 \cdot x)$  | <b>8754</b>  |
|               | 5  | $9915+35917 \cdot \exp(-0.2914 \cdot x)$   | <b>9915</b>  |
|               | 6  | $9260+46570 \cdot \exp(-0.21775 \cdot x)$  | <b>9260</b>  |
|               | 7  | $8485+36210 \cdot \exp(-0.1458 \cdot x)$   | <b>8485</b>  |
|               | 8  | $11000+81971 \cdot \exp(-0.60588 \cdot x)$ | <b>11000</b> |
|               | 9  | $10994+39650 \cdot \exp(-0.22358 \cdot x)$ | <b>10994</b> |
|               | 10 | $9050+36071 \cdot \exp(-0.20097 \cdot x)$  | <b>9050</b>  |
| <b>pH 11</b>  | 1  | $10325+41971 \cdot \exp(-0.09362 \cdot x)$ | <b>10325</b> |
|               | 2  | $9209+41255 \cdot \exp(-0.08432 \cdot x)$  | <b>9209</b>  |
|               | 3  | $6861+37369 \cdot \exp(-0.39876 \cdot x)$  | <b>6861</b>  |
|               | 4  | $3676+35050 \cdot \exp(-0.26109 \cdot x)$  | <b>3676</b>  |
|               | 5  | $245+30314 \cdot \exp(-0.0923 \cdot x)$    | <b>245</b>   |
|               | 6  | $3773+33858 \cdot \exp(-0.12639 \cdot x)$  | <b>3773</b>  |
|               | 7  | $3466+31820 \cdot \exp(-0.10741 \cdot x)$  | <b>3466</b>  |
|               | 8  | $4374+39204 \cdot \exp(-0.30942 \cdot x)$  | <b>4374</b>  |
|               | 9  | $4025+39178 \cdot \exp(-0.18341 \cdot x)$  | <b>4025</b>  |
|               | 10 | $4612+40266 \cdot \exp(-0.30791 \cdot x)$  | <b>4612</b>  |

## 2. Rejection rates details

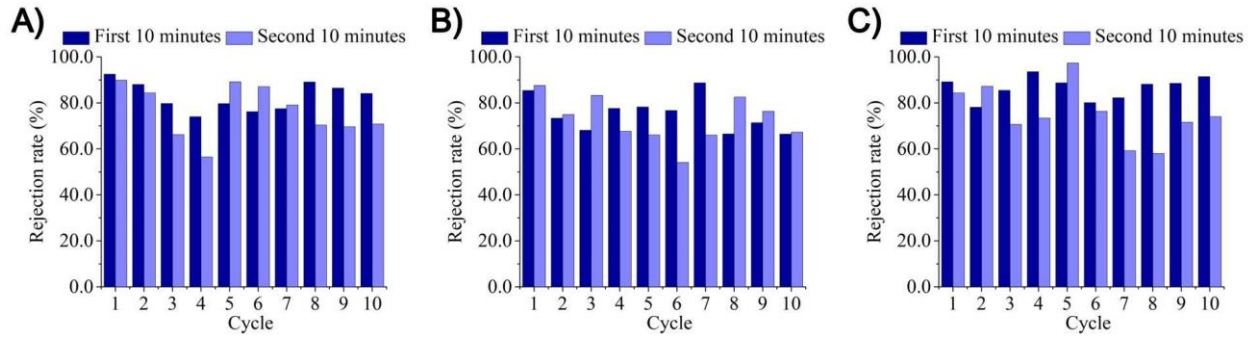

Figure S2: Set of graphs displaying the rejection rates of the nanocomposites prepared at the pH 2 (A), original pH (B), and pH 11 (C) over a period of first and second 10 minutes in 20 min cycles.

## 3. Catalytic contact time

The calculation of the catalytic contact time is determined according to the following set of formulas, where the volumetric flux can be described as the rate of volume flow across a unit area  $S$ , which is, in our case, the effective membrane area.

$$\text{volumetric flux} = \frac{\text{rate of volume flow}}{S} \quad (S1)$$

$$t = \frac{h}{\text{volumetric flux}} \quad (S2)$$

The catalytic contact time is the ratio between the decorated membrane thickness  $h$  and the calculated volumetric flux. The values for each cycle are displayed in Fig.S3.

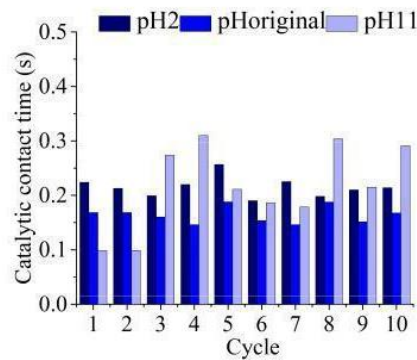

Figure S3: Catalytic contact time

#### 4. Economic sustainable footprint analysis

**Table S2.** Material cost

| Material          | Amount                | Price (€) | Supplier     |
|-------------------|-----------------------|-----------|--------------|
| AgNO <sub>3</sub> | per 1 g               | 3.3       | SigmaAldrich |
| Ti foil           | per 1 g               | 1.1       | SigmaAldrich |
| dH <sub>2</sub> O | per 1 L               | 0.11      | Envichem     |
| Isopropanol       | per 1 L               | 9.4       | Penta s.r.o. |
| KOH               | per 1 g               | 2.5       | Fluka        |
| PET support       | per 10 m <sup>2</sup> | 3.75      | Mogul        |
| Adhesive web      | per 10 m <sup>2</sup> | 0.98      | -            |
| Glass bathtub     | 1 piece               | 10.9      | P-Lab        |
| Laser batch       | 1 piece               | 8.8       | Thermofisher |

**Table S3.** Instruments cost

| Instrument               | Price (€) | Supplier      |
|--------------------------|-----------|---------------|
| Laser and optical system | 112 558   | NKT Photonics |
| Magnetic stirrer         | 162       | Vevor         |

**Table S4.** Instruments' lifetime

| Instrument               | Time (h) |
|--------------------------|----------|
| Laser and optical system | 100 000  |
| Magnetic stirrer         | 10 000   |
| Laser batch              | 2 600    |
| Glass bathtub            | 2 600    |

**Table S5.** Energy consumption of different parts of the setup, while the cost of 1 kWh in Czechia was 0.11599 EUR during 2022 ([www.kurzy.cz/komodity/cena-elektriny-graf-vyvoje-ceny/](http://www.kurzy.cz/komodity/cena-elektriny-graf-vyvoje-ceny/)).

| Item                          | Power (kWh) |
|-------------------------------|-------------|
| Laser                         | 0.5         |
| Computer                      | 0.2         |
| Scanning head                 | 0.3         |
| Magnetic stirrer              | 0.02        |
| Heating (Heat-press process)  | 1.0         |
| Pressing (Heat-press process) | 7.2         |

**Table S6.** Non-industrially-optimized laser production

| Material | Production (mg/h) |
|----------|-------------------|
| NPs      | 5.8               |
| Ag       | 2.0               |
| Ti       | 3.8               |

**Table S7.** Non-industrially-optimized laser irradiation times, which are necessary for the preparation of 1 m<sup>2</sup> nanocomposite. Since the element distributions on the nanocomposites vary depending on the employed pH, different irradiation times are necessary for producing the required amount of material.

| Modification pH | Time (h) |
|-----------------|----------|
| 2               | 24.4     |
| original        | 3.6      |
| 11              | 36.9     |

**Table S8.** Additional parameters associated with the preparation of 1 m<sup>2</sup> membrane. The PVDF nanofibers are prepared by electrospinning, then integrated into a PET nonwoven support by a heat-press process, and finally dehydrofluorinated to allow the addition of NPs.

| Item                 | Cost (€) | Preparation time (h) | Amount of material    | Supplier                       |
|----------------------|----------|----------------------|-----------------------|--------------------------------|
| PVDF nanofibers      | 8.54     | -                    | -                     | Elmarco                        |
| Heat-press           | 0.95     | 1                    | -                     | Pracovní stroje Teplice s.r.o. |
| Adhesive web         | 0.98     | -                    | per 10 m <sup>2</sup> | Sigma Aldrich                  |
| PET support          | 3.75     | -                    | per 10 m <sup>2</sup> | Mogul                          |
| Consumed KOH         | 0.09     | 1                    | 0.04 g                | Fluka                          |
| Consumed isopropanol | 0.11     | 1                    | 30 mL                 | Penta s.r.o.                   |

**Table S9.** PVDF microfilter membranes available on the market.

| Product                          | Dimensions               | Supplier           | Price |
|----------------------------------|--------------------------|--------------------|-------|
| PVDF membrane, pore size 0.45 μm | diameter 4.7 cm, 200 pcs | Membrane Solutions | 115 € |
| PVDF membrane, pore size 0.3 μm  | 30.5 x 30.5 cm           | Synder filtration  | 102 € |
| PVDF membrane, pore size 0.45 μm | diameter 14.2 cm, 50 pcs | Durapore           | 656 € |
| PVDF membrane, pore size 0.45 μm | 26.5 cm x 375 cm         | Thermo Scientific  | 452 € |

#### a. RLAL OPEX and CAPEX calculations

Note that IRT represents irradiation time.

$$IRT = \text{MAX} \left( \frac{\text{amount of element (Ag,Ti) on the membrane}}{\text{production of element (Ag,Ti) per hour}} \right) \quad (\text{S3})$$

$$\text{Energy cost of RLAL} = \text{cost per kWh} \times \text{laser setup power} \times IRT \quad (\text{S4})$$

$$\text{Ag cost} = \text{AgNO}_3 \text{ price} \times \frac{M(\text{AgNO}_3)}{M(\text{Ag})} \times \text{silver production} \times IRT \quad (\text{S5})$$

$$\text{Ti cost} = \text{titanium foil price} \times \text{titanium production} \times IRT \quad (\text{S6})$$

$$\text{dH}_2\text{O cost} = \text{dH}_2\text{O price} \times \text{volume of dH}_2\text{O consumed during IRT} \quad (\text{S7})$$

$$RLAL\ OPEX = \text{Energy cost of RLAL} + \text{Ag cost} + \text{Ti cost} + \text{dH2O cost} \quad (S8)$$

$$\text{Laser usage cost} = \frac{\text{Laser setup cost}}{\text{Laser setup lifetime}} \times IRT \quad (S9)$$

$$\text{Other RLAL CAPEX} = \left( \frac{\text{Magnetic stirrer cost}}{\text{Magnetic stirrer lifetime}} + \frac{\text{Laser batch cost}}{\text{Batch lifetime}} \right) \times IRT \quad (S10)$$

$$RLAL\ CAPEX = \text{Laser usage cost} + \text{Other CAPEX} \quad (S11)$$

## b. Heat-press process and alkalizations process cost calculations

Note that HP is an abbreviation for heat-press process and AT represents alkalization time.

$$\text{Energy cost of HP} = \text{HP time} \times \text{cost per kWh} \times \text{HP power} \quad (S12)$$

$$\text{HP cost} = \text{Energy cost of HP} + \text{Adhesive web price} + \text{PET price} \quad (S13)$$

$$\text{KOH cost} = \text{KOH price} \times \text{amount of KOH on the membrane} \quad (S14)$$

$$\text{Isopropanol cost} = \text{Isopropanol price} \times \text{consumed isopropanol} \quad (S15)$$

$$\left( \frac{\text{Glass bathtub}}{\text{Bathtub lifetime}} + \frac{\text{Alkalization cost}}{\text{Magnetic stirrer lifetime}} + \text{magnetic stirrer power} \times \text{cost per kWh} \right) \times AT \quad (S16)$$

## 5. Table of Content

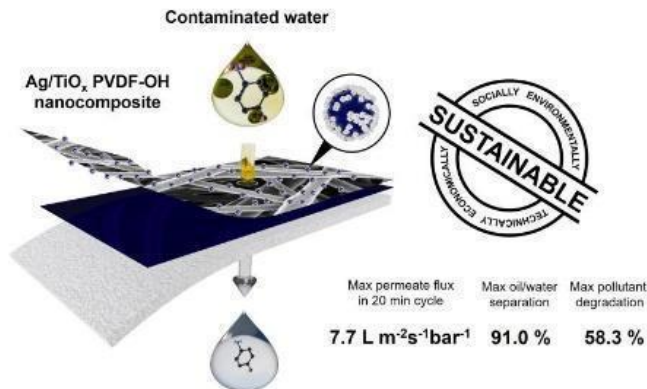

Figure S4: Freshwater scarcity remains a global challenge, often exacerbated by oil contamination. The current study tackles this issue by cleaning oily wastewater while removing its dissolved organic pollutants with PVDF-OH Ag/TiO<sub>x</sub> sustainable nanocomposites.
